# Supplementary material for: HTS-Based Diagnostics of Sugarcane Viruses: Seasonal Variation and Its Implications for Accurate Detection
Source: MDPI journal article supplement (doi:10.3390/v13081627), 2021-08-17
Supplement: s1 [file s1]

**Table S1:** Summary of read sub-sampling analysis for viral pathogen detection.

| Sample | Season* | No. of reads sampled <sup>†</sup> | Virus identified <sup>‡</sup> | Accession of the top hit <sup>§</sup> | Viral genome size (bp) <sup>  </sup> | Average no. of mapped reads <sup>¶</sup> | SE of mapped reads | % genome coverage <sup>§</sup> |
|--------|---------|-----------------------------------|-------------------------------|---------------------------------------|--------------------------------------|------------------------------------------|--------------------|--------------------------------|
| P8     | Fall    | 500,000                           | SCYLV-BRA                     | AF157029                              | 5899                                 | 762                                      | 18                 | 98                             |
|        |         | 1,000,000                         |                               |                                       |                                      | 1,624                                    | 37                 | 99                             |
|        |         | 5,000,000                         |                               |                                       |                                      | 8,086                                    | 51                 | 99                             |
|        |         | 10,000,000                        |                               |                                       |                                      | 16,076                                   | 55                 | 99                             |
|        |         | 20,000,000                        |                               |                                       |                                      | 31,993                                   | 22                 | 99                             |
| P8     | Spring  | 500,000                           | SCYLV-BRA                     | AF157029                              | 5899                                 | 3,214                                    | 30                 | 99                             |
|        |         | 1,000,000                         |                               |                                       |                                      | 6,379                                    | 25                 | 99                             |
|        |         | 5,000,000                         |                               |                                       |                                      | 32,318                                   | 100                | 99                             |
|        |         | 10,000,000                        |                               |                                       |                                      | 64,668                                   | 67                 | 99                             |
|        |         | 20,000,000                        |                               |                                       |                                      | 129,088                                  | 148                | 99                             |
| P9     | Fall    | 500,000                           | SCYLV-BRA                     | AF157029                              | 5899                                 | 275                                      | 8                  | 92                             |
|        |         | 1,000,000                         |                               |                                       |                                      | 534                                      | 9                  | 98                             |
|        |         | 5,000,000                         |                               |                                       |                                      | 2,796                                    | 28                 | 99                             |
|        |         | 10,000,000                        |                               |                                       |                                      | 5,456                                    | 9                  | 99                             |
|        |         | 20,000,000                        |                               |                                       |                                      | 11,066                                   | 48                 | 99                             |
| P9     | Spring  | 500,000                           | SCYLV-BRA                     | AF157029                              | 5899                                 | 4,605                                    | 7                  | 99                             |
|        |         | 1,000,000                         |                               |                                       |                                      | 9,153                                    | 90                 | 99                             |
|        |         | 5,000,000                         |                               |                                       |                                      | 45,975                                   | 64                 | 99                             |
|        |         | 10,000,000                        |                               |                                       |                                      | 92,096                                   | 168                | 100                            |
|        |         | 20,000,000                        |                               |                                       |                                      | 184,249                                  | 198                | 100                            |
| P4     | Fall    | 500,000                           | FDV                           | NC_007159                             | 4532                                 | 189                                      | 9                  | 92                             |
|        |         | 1,000,000                         |                               |                                       |                                      | 376                                      | 16                 | 98                             |
|        |         | 5,000,000                         |                               |                                       |                                      | 1,861                                    | 34                 | 100                            |
|        |         | 10,000,000                        |                               |                                       |                                      | 3,762                                    | 18                 | 100                            |
|        |         | 20,000,000                        |                               |                                       |                                      | 7,618                                    | 12                 | 100                            |
| P4     | Spring  | 500,000                           | FDV                           | NC_007159                             | 4532                                 | 4,408                                    | 18                 | 100                            |
|        |         | 1,000,000                         |                               |                                       |                                      | 8,866                                    | 49                 | 100                            |
|        |         | 5,000,000                         |                               |                                       |                                      | 44,373                                   | 8                  | 100                            |
|        |         | 10,000,000                        |                               |                                       |                                      | 88,408                                   | 68                 | 100                            |
|        |         | 20,000,000                        |                               |                                       |                                      | 176,904                                  | 66                 | 100                            |
| P3     | Fall    | 500,000                           | SCSMaV                        | NC_003870                             | 8146                                 | 5,141                                    | 50                 | 100                            |
|        |         | 1,000,000                         |                               |                                       |                                      | 10,337                                   | 20                 | 100                            |
|        |         | 5,000,000                         |                               |                                       |                                      | 51,432                                   | 177                | 100                            |
|        |         | 10,000,000                        |                               |                                       |                                      | 102,587                                  | 191                | 100                            |
|        |         | 20,000,000                        |                               |                                       |                                      | 205,661                                  | 231                | 100                            |
| P3     | Spring  | 500,000                           | SCSMaV                        | NC_003870                             | 8146                                 | 4,813                                    | 41                 | 100                            |
|        |         | 1,000,000                         |                               |                                       |                                      | 9,456                                    | 84                 | 100                            |

|    |        |            |           |           |      |           |     |     |
|----|--------|------------|-----------|-----------|------|-----------|-----|-----|
|    |        | 5,000,000  |           |           |      | 47,742    | 75  | 100 |
|    |        | 10,000,000 |           |           |      | 95,313    | 250 | 100 |
|    |        | 20,000,000 |           |           |      | 190,695   | 44  | 100 |
| P7 | Fall   | 500,000    | SCSMV     | NC_014037 | 9782 | 10,461    | 22  | 100 |
|    |        | 1,000,000  |           |           |      | 20,859    | 101 | 100 |
|    |        | 5,000,000  |           |           |      | 105,303   | 124 | 100 |
|    |        | 10,000,000 |           |           |      | 210,558   | 77  | 100 |
|    |        | 20,000,000 |           |           |      | 420,743   | 100 | 100 |
|    |        | 25,000,000 |           |           |      | 527,457   | 924 | 100 |
|    |        | 30,000,000 |           |           |      | 632,028   | 116 | 100 |
|    |        | 35,000,000 |           |           |      | 736,891   | 333 | 100 |
| P7 | Spring | 500,000    | SCSMV     | NC_014037 | 9782 | 26,971    | 54  | 100 |
|    |        | 1,000,000  |           |           |      | 53,759    | 71  | 100 |
|    |        | 5,000,000  |           |           |      | 267,685   | 75  | 100 |
|    |        | 10,000,000 |           |           |      | 536,240   | 245 | 100 |
|    |        | 20,000,000 |           |           |      | 1,073,055 | 479 | 100 |
|    |        | 25,000,000 |           |           |      | 1,341,120 | 577 | 100 |
| P1 | Spring | 500,000    | SCMV      | JX237862  | 9571 | 21,596    | 113 | 100 |
|    |        | 1,000,000  |           |           |      | 43,037    | 81  | 100 |
|    |        | 5,000,000  |           |           |      | 215,995   | 82  | 100 |
|    |        | 10,000,000 |           |           |      | 431,270   | 383 | 100 |
|    |        | 20,000,000 |           |           |      | 862,117   | 244 | 100 |
| P1 | Fall   | 500,000    | SCMV      | JX237862  | 9571 | 12,287    | 11  | 100 |
|    |        | 1,000,000  |           |           |      | 24,671    | 87  | 100 |
|    |        | 5,000,000  |           |           |      | 122,930   | 294 | 100 |
|    |        | 10,000,000 |           |           |      | 245,268   | 140 | 100 |
|    |        | 20,000,000 |           |           |      | 491,477   | 155 | 100 |
| P1 | Spring | 500,000    | SCYLV-BRA | AF157029  | 5899 | 4,323     | 19  | 99  |
|    |        | 1,000,000  |           |           |      | 8,764     | 20  | 99  |
|    |        | 5,000,000  |           |           |      | 43,432    | 168 | 99  |
|    |        | 10,000,000 |           |           |      | 86,899    | 177 | 99  |
|    |        | 20,000,000 |           |           |      | 174,245   | 157 | 99  |
| P1 | Fall   | 500,000    | SCYLV-BRA | AF157029  | 5899 | 1,147     | 27  | 99  |
|    |        | 1,000,000  |           |           |      | 2,378     | 43  | 99  |
|    |        | 5,000,000  |           |           |      | 11,835    | 58  | 99  |
|    |        | 10,000,000 |           |           |      | 23,470    | 52  | 99  |
|    |        | 20,000,000 |           |           |      | 46,844    | 123 | 99  |
| P5 | Spring | 500,000    | SCSEV     | NC_001868 | 2706 | 129       | 3   | 84  |
|    |        | 1,000,000  |           |           |      | 256       | 8   | 93  |
|    |        | 5,000,000  |           |           |      | 1,296     | 9   | 100 |
|    |        | 10,000,000 |           |           |      | 2,615     | 2   | 100 |

|    |        |            |           |           |      |         |     |     |
|----|--------|------------|-----------|-----------|------|---------|-----|-----|
|    |        | 20,000,000 |           |           |      | 5,254   | 16  | 100 |
|    |        | 25,000,000 |           |           |      | 6,402   | 6   | 100 |
| P5 | Fall   | 500,000    | SCSEV     | NC_001868 | 2706 | 13      | 1   | 30  |
|    |        | 1,000,000  |           |           |      | 22      | 1   | 46  |
|    |        | 5,000,000  |           |           |      | 111     | 7   | 94  |
|    |        | 10,000,000 |           |           |      | 233     | 8   | 100 |
|    |        | 20,000,000 |           |           |      | 469     | 2   | 100 |
|    |        | 25,000,000 |           |           |      | 581     | 2   | 100 |
| P5 | Spring | 500,000    | SCWSV     | NC_023989 | 2830 | 24      | 1   | 30  |
|    |        | 1,000,000  |           |           |      | 45      | 5   | 44  |
|    |        | 5,000,000  |           |           |      | 253     | 6   | 72  |
|    |        | 10,000,000 |           |           |      | 503     | 4   | 87  |
|    |        | 20,000,000 |           |           |      | 970     | 9   | 92  |
|    |        | 25,000,000 |           |           |      | 1,199   | 1   | 94  |
| P5 | Fall   | 500,000    | SCWSV     | NC_023989 | 2830 | 6       | 2   | 14  |
|    |        | 1,000,000  |           |           |      | 12      | 0   | 23  |
|    |        | 5,000,000  |           |           |      | 82      | 17  | 53  |
|    |        | 10,000,000 |           |           |      | 144     | 16  | 65  |
|    |        | 20,000,000 |           |           |      | 262     | 2   | 73  |
|    |        | 25,000,000 |           |           |      | 330     | 0   | 79  |
| P6 | Spring | 500,000    | SCYLV-CHN | GU190159  | 5879 | 4,768   | 84  | 99  |
|    |        | 1,000,000  |           |           |      | 9,630   | 100 | 99  |
|    |        | 5,000,000  |           |           |      | 48,193  | 73  | 99  |
|    |        | 10,000,000 |           |           |      | 96,912  | 158 | 99  |
|    |        | 20,000,000 |           |           |      | 193,051 | 93  | 99  |
| P6 | Fall   | 500,000    | SCYLV-CHN | GU190159  | 5879 | 1,354   | 18  | 100 |
|    |        | 1,000,000  |           |           |      | 2,688   | 22  | 100 |
|    |        | 5,000,000  |           |           |      | 13,442  | 38  | 100 |
|    |        | 10,000,000 |           |           |      | 26,890  | 21  | 100 |
|    |        | 20,000,000 |           |           |      | 54,012  | 88  | 100 |
| P2 | Spring | 500,000    | SCYLV-CHN | GU190159  | 5879 | 4,967   | 31  | 99  |
|    |        | 1,000,000  |           |           |      | 9,910   | 15  | 99  |
|    |        | 5,000,000  |           |           |      | 49,356  | 71  | 100 |
|    |        | 10,000,000 |           |           |      | 98,995  | 87  | 100 |
|    |        | 20,000,000 |           |           |      | 197,759 | 187 | 100 |
| P2 | Fall   | 500,000    | SCYLV-CHN | GU190159  | 5879 | 804     | 4   | 100 |
|    |        | 1,000,000  |           |           |      | 1,561   | 25  | 100 |
|    |        | 5,000,000  |           |           |      | 7,967   | 12  | 100 |
|    |        | 10,000,000 |           |           |      | 15,921  | 56  | 100 |
|    |        | 20,000,000 |           |           |      | 32,108  | 318 | 100 |

Both RNA (names in bold) and DNA viruses were identified and validated using CLC Genomics Workbench.

Abbreviations: *Sugarcane yellow leaf virus*-Brazil (SCYLV-BRA); *Sugarcane mosaic virus* (SCMV); *Sugarcane yellow leaf virus*-China (SCYLV-CHN); *Sugarcane striate mosaic associated virus* (SCSMaV); *Fiji disease virus* (FDV); *Sugarcane streak Egypt virus* (SCSEV); *Sugarcane white streak virus* (SCWSV); *Sugarcane streak mosaic virus* (SCSMV); standard error (SE).

\*Season of sampling and RNA extraction.

<sup>II</sup>Sequence reads were randomly sampled using the 'Sample Reads' feature under NGS Core Tools in CLC Genomics Workbench.

<sup>Ψ</sup>Viral pathogens were identified by mapping assembled contigs to virus database using BLAST program implemented in CLC Genomics Workbench.

<sup>δ</sup>GenBank accession of the top viral hit identified by BLAST analysis.

<sup>Ω</sup>Genome size of the best hit accession from GenBank.

<sup>φ</sup>Average number of sequencing reads mapped to best hit viral genome obtained from BLAST analysis.

<sup>β</sup>Average genome coverage of sequence reads mapped to best hit viral genome

**Table S2.** qPCR assays used to validate HTS results

| Target                  | Forward Primer (5'- 3') | Probe (5'- 3') <sup>1,2</sup>  | Reverse Primer (5'- 3')   |
|-------------------------|-------------------------|--------------------------------|---------------------------|
| <b>SCYLV</b>            | GGCTCCAAGATTACTAGCTTCC  | CGTCAAGAGGAACGCCAAGAAAGTCT     | CTCGAGTCTCCATTCCCTTTG     |
| <b>SCSMV</b>            | CGTAGCGGGAAACCCATAATAC  | CACACAATGCAGTGAAGGCAGGAT       | GATTTCTGCTGGTGAGAGGATG    |
| <b>SCSEV</b>            | GCGGGCGATTACTTCCATAA    | CCTTGGTGTGAAGACGGAGTGGAA       | GGTACAACGCACCCTTCTTAAT    |
| <b>SCWSV</b>            | AAAGACGAGGAGCGGAAAC     | TCAAGCTGGTGTTCGCTGTAACT        | CACATCCCACGGGATACATATT    |
| <b>FDV</b>              | TCAAGAATGAAGAACAGTCTGA  | CGCGAAGAATTGTAGTTGAATTGGT      | GGAGTGTATTCAATTCGTCTCT    |
| <b>SCSMaV</b>           | GAACCAGAAGGTGGGTTACTT   | TGAGAGCTGCAAACATGGCTAGGA       | CCTCCCTTTCTCTCACTTCTTT    |
| <b>SCMV</b>             | CAGCGAAATCTCACCGACTAT   | ACGAAATGACTTCAAGGACACCAGCT     | CTGCATGTGGGCTTCCTTA       |
| <b>Nad5<sup>3</sup></b> | GATGCTTCTTGGGGCTTCTTKTT | CATAAGTAGCTTGGTCCATCTTTATTCCAT | ACATAAATCGAGGGCTATGCGGATC |

<sup>1</sup> For viruses, 5' fluorescent dye and 3' quencher is FAM and IBFQ, respectively; internal quencher ZEN is added.

<sup>2</sup> For Nad5, 5' fluorescent dye and 3' quencher is VIC and BHQ-1, respectively.

<sup>3</sup> Designed by USDA APHIS S&T Beltsville Laboratory.

**Table S3.** RT-PCR and RT-PCR validation of HTS results

| RT-PCR                    |          | qRT-PCR |           |                                  |
|---------------------------|----------|---------|-----------|----------------------------------|
|                           |          | Ct (CP) | Ct (Nad5) | Seasonal Change<br>(Fall/Spring) |
| <b>RNA Viruses/Sample</b> |          |         |           |                                  |
| SCYLV-Sp/P1               | Positive | 17.49   | 19.70     | 18.04                            |
| SCYLV-Fa/P1               | Positive | 20.30   | 18.33     |                                  |
| SCMV-Sp/P1                | Positive | 14.10   | 17.87     | 2.32                             |
| SCMV-Fa/P1                | Positive | 15.06   | 17.62     |                                  |
| SCYLV-Sp/P2               | Positive | 19.99   | 20.35     | 2.58                             |
| SCYLV-Fa/P2               | Positive | 18.77   | 17.77     |                                  |
| SCSMaV-Sp/P3              | Positive | 17.93   | 19.98     | 0.92                             |
| SCSMaV-Fa/P3              | Positive | 17.20   | 19.37     |                                  |
| FDV-Sp/P4                 | Positive | 15.73   | 20.32     | 77.90                            |
| FDV-Fa/P4                 | Positive | 20.51   | 18.81     |                                  |
| SCYLV-Sp/P6               | Positive | 17.32   | 20.96     | 4.56                             |
| SCYLV-Fa/P6               | Positive | 19.67   | 21.12     |                                  |
| SCSMV-Sp/P7               | Positive | 15.40   | 19.61     | 8.31                             |
| SCSMV-Fa/P7               | Positive | 17.40   | 18.55     |                                  |
| SCYLV-Sp/P8               | Positive | 17.56   | 20.41     | 3.00                             |
| SCYLV-Fa/P8               | Positive | 19.38   | 20.65     |                                  |
| SCYLV-Sp/P9               | Positive | 18.46   | 20.42     | 36.92                            |
| SCYLV-Fa/P9               | Positive | 23.18   | 19.94     |                                  |
| <b>DNA Viruses/Sample</b> |          |         |           |                                  |
| SCSEV-Sp/P5               | Positive | 14.83   | 21.16     | 7.41                             |
| SCSEV-Fa/P5               | Positive | 15.63   | 19.05     |                                  |
| SCWSV-Sp/P5               | Positive | 22.05   | 21.44     | 1.20                             |
| SCWSV-Fa/P5               | Positive | 20.81   | 19.95     |                                  |
